# Supplementary material
Source: MDPI journal article supplement (https://www.mdpi.com/2073-4395/12/2/494)
Supplement: s1 [file s1]

Table S1. Gene IDs, FPKM values and description of studied tomato genes

| Gene name | gene_id          | EF11_fpk  | EF12_fpk  | EF13_fpk  | TS11_fpk  | TS12_fpk  | TS13_fpk  | gene_description                             |
|-----------|------------------|-----------|-----------|-----------|-----------|-----------|-----------|----------------------------------------------|
| SISOD1    | Solyc01g067740.3 | 448.56751 | 446.59430 | 463.43330 | 331.48452 | 347.65204 | 342.52133 | Superoxide dismutase [Cu-Zn]                 |
| SISOD2    | Solyc03g062890.3 | 29.01893  | 27.90811  | 26.16470  | 24.70896  | 22.47509  | 22.37868  | Superoxide dismutase [Cu-Zn]                 |
| SISOD3    | Solyc11g066390.2 | 9.08400   | 7.91218   | 10.72026  | 7.11807   | 6.09904   | 5.81553   | Superoxide dismutase [Cu-Zn]                 |
| SISOD4    | Solyc06g049080.3 | 6.50419   | 4.90908   | 5.89756   | 5.01548   | 5.91226   | 4.92984   | Superoxide dismutase                         |
| SISOD5    | Solyc02g021140.3 | 6.15503   | 6.50376   | 5.05900   | 5.15732   | 4.42608   | 5.83149   | Superoxide dismutase                         |
| SIPOD1    | Solyc02g094180.3 | 48.72335  | 36.97092  | 36.50255  | 76.79540  | 60.64533  | 59.68233  | Peroxidase                                   |
| SIPOD2    | Solyc03g006700.3 | 218.56448 | 239.24662 | 285.84045 | 86.86441  | 89.11802  | 90.69898  | Peroxidase                                   |
| SIPOD3    | Solyc01g105070.3 | 126.74108 | 114.17754 | 121.28762 | 185.09615 | 176.65271 | 216.84451 | Peroxidase                                   |
| SIPOD4    | Solyc02g092580.3 | 64.64953  | 95.06073  | 145.87857 | 27.93424  | 36.77283  | 43.29667  | Peroxidase                                   |
| SIPOD5    | Solyc02g080530.3 | 17.96198  | 14.62106  | 12.64441  | 41.91736  | 39.17786  | 30.16424  | Peroxidase                                   |
| SIPOD6    | Solyc06g050440.3 | 36.22965  | 22.18126  | 35.64250  | 25.87795  | 20.57830  | 17.13083  | Peroxidase                                   |
| SIPOD7    | Solyc01g105080.3 | 21.83308  | 21.79012  | 15.14909  | 6.21236   | 8.26636   | 9.52840   | Peroxidase                                   |
| SIPOD8    | Solyc05g046010.3 | 26.21871  | 22.74811  | 25.32185  | 3.26562   | 1.11619   | 1.47700   | Peroxidase                                   |
| SIPOD9    | Solyc04g080330.3 | 0.49917   | 0.74384   | 0.50972   | 1.61568   | 1.22281   | 1.70741   | Peroxidase                                   |
| SIPOD10   | Solyc08g013930.3 | 9.54189   | 5.05332   | 3.33519   | 2.56233   | 2.47582   | 0.61511   | Peroxidase                                   |
| SIPOD11   | Solyc11g010120.2 | 0.37292   | 0.38701   | 0.24083   | 2.07349   | 2.14531   | 1.82663   | Peroxidase                                   |
| SIPOD12   | Solyc02g090450.3 | 1.50368   | 1.04570   | 0.60067   | 0.51250   | 0.39812   | 0.61392   | Peroxidase                                   |
| SIPOD13   | Solyc01g006310.3 | 6.98712   | 5.36468   | 2.50683   | 0.05691   | 0.23342   | 0.23681   | Peroxidase                                   |
| SIPOD14   | Solyc12g017870.2 | 5.33645   | 1.31860   | 0.77496   | 0.55160   | 0.47859   | 0.83864   | Peroxidase                                   |
| SIPOD15   | Solyc05g055320.3 | 2.67875   | 0.34750   | 0.31800   | 0.11840   | 0.02023   | 0.26686   | Peroxidase                                   |
| SIPOD16   | Solyc08g007150.1 | 0.37350   | 0.45221   | 0.26801   | 2.18275   | 2.74977   | 3.24377   | Peroxidase                                   |
| SICAT1    | Solyc12g094620.2 | 186.28040 | 320.63482 | 258.48509 | 79.61381  | 81.75255  | 88.24423  | Catalase                                     |
| SICAT2    | Solyc02g082760.3 | 55.97176  | 38.87128  | 33.74296  | 58.31213  | 49.42587  | 46.31250  | Catalase                                     |
| SICAT3    | Solyc04g082460.3 | 5.14081   | 4.37003   | 5.79763   | 5.44910   | 4.83048   | 4.99193   | Catalase                                     |
| SICAT4    | Solyc01g100630.2 | 4.64309   | 5.44163   | 4.43746   | 13.71431  | 12.13003  | 12.68132  | Catalase                                     |
| SICAT5    | Solyc01g100640.3 | 5.49826   | 7.85749   | 5.33588   | 12.91309  | 15.92629  | 13.33907  | Catalase                                     |
| SICAT6    | Solyc01g099420.2 | 7.00994   | 3.63742   | 6.60192   | 14.04569  | 13.68230  | 13.69801  | Catalase                                     |
| SIAPX1    | Solyc06g005160.3 | 375.41020 | 350.60266 | 374.24378 | 232.24362 | 233.82625 | 247.79291 | Cytosolic ascorbate peroxidase 1             |
| SIAPX2    | Solyc06g005150.3 | 144.03762 | 127.37989 | 135.74180 | 115.09925 | 116.21231 | 119.78593 | Ascorbate peroxidase                         |
| SIAPX3    | Solyc08g059760.3 | 3.56607   | 3.54500   | 2.26257   | 3.98630   | 3.74049   | 3.63823   | Putative L-ascorbate peroxidase 6            |
| SIAPX4    | Solyc02g083630.3 | 1.61150   | 1.25430   | 1.50325   | 3.04058   | 2.95225   | 2.15532   | L-ascorbate peroxidase 5                     |
| SIGR1     | Solyc09g065900.3 | 3.69941   | 4.60705   | 4.93132   | 5.78741   | 5.87593   | 5.21968   | Glutathione reductase                        |
| SIACC1    | Solyc02g091990.3 | 15.29206  | 14.73305  | 16.96472  | 80.76707  | 86.53897  | 70.17891  | 1-aminocyclopropane-1-carboxylate synthase 3 |
| SIACC2    | Solyc07g049530.3 | 71.55908  | 75.63396  | 99.19927  | 26.81789  | 25.50894  | 29.15183  | 1-aminocyclopropane-1-carboxylate oxidase 1  |
| SIACC3    | Solyc01g095080.3 | 17.69407  | 22.01771  | 30.05312  | 13.63371  | 21.41859  | 16.41428  | 1-aminocyclopropane-1-carboxylate synthase 2 |
| SIACC4    | Solyc08g081540.3 | 9.76631   | 6.55051   | 5.88121   | 24.22476  | 25.38842  | 21.10919  | 1-amino-cyclopropane-1-carboxylate synthase  |
| SIACC5    | Solyc07g026650.3 | 6.35554   | 23.31401  | 13.44387  | 0.53060   | 0.54408   | 0.45997   | 1-aminocyclopropane-1-carboxylate oxidase    |
| SIACC6    | Solyc07g049550.3 | 9.72104   | 14.96987  | 11.95783  | 0.85272   | 0.92039   | 0.70030   | 1-aminocyclopropane-1-carboxylate oxidase 4  |
| SIACC7    | Solyc02g036350.3 | 0.67052   | 0.95680   | 0.40596   | 0.12595   | 0.12915   | 0.34940   | 1-aminocyclopropane-1-carboxylate oxidase    |
| SICesA1   | Solyc12g056580.2 | 214.76295 | 250.79047 | 275.55819 | 316.97277 | 323.27324 | 316.53304 | Cellulose synthase                           |
| SICesA2   | Solyc04g071650.3 | 224.51724 | 256.21490 | 353.52309 | 157.23050 | 184.18652 | 170.80330 | Cellulose synthase                           |
| SICesA3   | Solyc01g087210.3 | 170.87477 | 211.30855 | 248.50783 | 232.48734 | 231.56319 | 219.85547 | Cellulose synthase                           |
| SICesA4   | Solyc08g061100.3 | 187.61640 | 234.18387 | 250.79615 | 158.01920 | 174.42114 | 166.91438 | Cellulose synthase                           |
| SICesA5   | Solyc02g072240.3 | 3.47553   | 4.68892   | 4.65526   | 4.33306   | 6.02994   | 3.58187   | Cellulose synthase                           |
| SICesA6   | Solyc07g005840.2 | 0.46450   | 0.85286   | 0.82685   | 0.69803   | 1.17458   | 0.78199   | Cellulose synthase                           |
